# Supplementary material for: Virological characteristics of the SARS-CoV-2 Omicron XBB.1.5 variant
Source: PubMed Central journal article supplement (PMC10853506; doi:10.1038/s41467-024-45274-3), 2024-02-08
Supplement: 41467_2024_45274_MOESM7_ESM.pdf [file 41467_2024_45274_MOESM7_ESM.pdf]

## Reporting Summary

Nature Portfolio wishes to improve the reproducibility of the work that we publish. This form provides structure for consistency and transparency in reporting. For further information on Nature Portfolio policies, see our [Editorial Policies](#) and the [Editorial Policy Checklist](#).

### Statistics

For all statistical analyses, confirm that the following items are present in the figure legend, table legend, main text, or Methods section.

- |                                     |                                                                                                                                                                                                                                                                                                |
|-------------------------------------|------------------------------------------------------------------------------------------------------------------------------------------------------------------------------------------------------------------------------------------------------------------------------------------------|
| n/a                                 | Confirmed                                                                                                                                                                                                                                                                                      |
| <input type="checkbox"/>            | <input checked="" type="checkbox"/> The exact sample size ( <i>n</i> ) for each experimental group/condition, given as a discrete number and unit of measurement                                                                                                                               |
| <input type="checkbox"/>            | <input checked="" type="checkbox"/> A statement on whether measurements were taken from distinct samples or whether the same sample was measured repeatedly                                                                                                                                    |
| <input type="checkbox"/>            | <input checked="" type="checkbox"/> The statistical test(s) used AND whether they are one- or two-sided<br><i>Only common tests should be described solely by name; describe more complex techniques in the Methods section.</i>                                                               |
| <input checked="" type="checkbox"/> | <input type="checkbox"/> A description of all covariates tested                                                                                                                                                                                                                                |
| <input checked="" type="checkbox"/> | <input type="checkbox"/> A description of any assumptions or corrections, such as tests of normality and adjustment for multiple comparisons                                                                                                                                                   |
| <input type="checkbox"/>            | <input checked="" type="checkbox"/> A full description of the statistical parameters including central tendency (e.g. means) or other basic estimates (e.g. regression coefficient) AND variation (e.g. standard deviation) or associated estimates of uncertainty (e.g. confidence intervals) |
| <input type="checkbox"/>            | <input checked="" type="checkbox"/> For null hypothesis testing, the test statistic (e.g. <i>F</i> , <i>t</i> , <i>r</i> ) with confidence intervals, effect sizes, degrees of freedom and <i>P</i> value noted<br><i>Give P values as exact values whenever suitable.</i>                     |
| <input type="checkbox"/>            | <input checked="" type="checkbox"/> For Bayesian analysis, information on the choice of priors and Markov chain Monte Carlo settings                                                                                                                                                           |
| <input checked="" type="checkbox"/> | <input type="checkbox"/> For hierarchical and complex designs, identification of the appropriate level for tests and full reporting of outcomes                                                                                                                                                |
| <input checked="" type="checkbox"/> | <input type="checkbox"/> Estimates of effect sizes (e.g. Cohen's <i>d</i> , Pearson's <i>r</i> ), indicating how they were calculated                                                                                                                                                          |

Our web collection on [statistics for biologists](#) contains articles on many of the points above.

### Software and code

Policy information about [availability of computer code](#)

|                 |                                                                                                                                                                                                                                                                                                                                                                                                                                                                                                                                                                                                                                                                                                                                                                                                                                                                                                                                                                           |
|-----------------|---------------------------------------------------------------------------------------------------------------------------------------------------------------------------------------------------------------------------------------------------------------------------------------------------------------------------------------------------------------------------------------------------------------------------------------------------------------------------------------------------------------------------------------------------------------------------------------------------------------------------------------------------------------------------------------------------------------------------------------------------------------------------------------------------------------------------------------------------------------------------------------------------------------------------------------------------------------------------|
| Data collection | GloMax explorer multimode microplate reader 3500 (Promega), Centro XS3 LB960 (Berthold Technologies), MACSQuant Analyzer (Miltenyi Biotec), FACS Canto II (BD Biosciences), QuantStudio 1 Real-Time PCR system (Thermo Fisher Scientific), QuantStudio 3 Real-Time PCR system (Thermo Fisher Scientific), QuantStudio 5 Real-Time PCR system (Thermo Fisher Scientific), StepOne Plus Real-Time PCR system (Thermo Fisher Scientific), CFX Connect Real-Time PCR Detection system (Bio-Rad), Eco Real-Time PCR System (Illumina), qTOWER3 G Real-Time System (Analytik Jena), Thermal Cycler Dice Real Time System III (Takara), 7500 Real-Time PCR System (Thermo Fisher Scientific), FinePointe Station and Review software v2.9.2.12849 (DSI), NDP.scan software v3.2.4 (Hamamatsu Photonics), Buxco Small Animal Whole Body Plethysmography system (DSI), All-in-one Fluorescence Microscope BZ-X810 (KEYENCE), SeqStudio Genetic Analyzer (Thermo Fisher Scientific) |
| Data analysis   | FlowJo software v10.7.1 and v10.9 (BD Biosciences), Sequencher software v5.1 (Gene Codes Corporation), Excel software v16.16.8 (Microsoft), Prism 9 software v9.1.1 and v10.10 (GraphPad Software), Fiji software v2.2.0 (ImageJ), ViralMSA v1.1.24 (Moshiri et al., 2021), TrimAl v1.4.rev22 (Capella-Gutiérrez et al., 2009), IQ-TREE v2.2.0 (Minh et al., 2020), R v4.2.2 (R Core Team, 2023), EnvStats v2.7.0 (Millard, 2013), ggtree v3.6.2 (Yu, 2020), cryoSPARC v4.1.2 (Structura Biotechnology), UCSF Chimera v1.15, UCSF ChimeraX v1.4, UCSF Chimera v1.16, Coot v0.9.8.7, SAMtools v1.9, snpEff v5.0e, Pymol v2.5.0 (Schrodinger), Phenix v1.20, Molprobit v4.5.2, Python v3.7, MAFFT v7.511<br>The computational codes used in phylogenetic analyses and ancestral sequence reconstruction are available in the GitHub repository ( <a href="https://github.com/TheSatoLab/Omicron_XBB.1.5">https://github.com/TheSatoLab/Omicron_XBB.1.5</a> ).               |

For manuscripts utilizing custom algorithms or software that are central to the research but not yet described in published literature, software must be made available to editors and reviewers. We strongly encourage code deposition in a community repository (e.g. GitHub). See the Nature Portfolio [guidelines for submitting code & software](#) for further information.

## Data

Policy information about [availability of data](#)

All manuscripts must include a [data availability statement](#). This statement should provide the following information, where applicable:

- Accession codes, unique identifiers, or web links for publicly available datasets
- A description of any restrictions on data availability
- For clinical datasets or third party data, please ensure that the statement adheres to our [policy](#)

SARS-CoV-2 genomic sequences and their related surveillance data are available from GISAID database (<https://www.gisaid.org>). The supplemental tables for the GISAID datasets (EPI\_SET\_231124cy) and the raw data of virus sequences analyzed in this study are deposited in the GitHub repository ([https://github.com/TheSatoLab/Omicron\\_XBB.1.5](https://github.com/TheSatoLab/Omicron_XBB.1.5)). The accession numbers of viral sequences used in this study are listed in Method section. The atomic coordinates and cryo-EM maps for the structures are deposited in the PDB (<https://www.rcsb.org/search>) and the EMDB (<https://www.ebi.ac.uk/emdb/>). The atomic coordinates and cryo-EM maps for the structures of the XBB.1.5 S protein closed-1 state (PDB code: 8JYK, EMDB code: 36724), closed-2 state (PDB code: 8JYM, EMDB code: 36726), in complex with hACE2 RBD one-up state (PDB code: 8JYN, EMDB code: 36727), in complex with hACE2 RBD two-up state (PDB code: 8JYO, EMDB code: 36728), and XBB.1.5 S RBD-hACE2 (PDB code: 8JYP, EMDB code: 36729) have been deposited in the Protein Data Bank ([www.rcsb.org](http://www.rcsb.org)) and Electron Microscopy Data Bank ([www.ebi.ac.uk/emdb/](http://www.ebi.ac.uk/emdb/)).

## Research involving human participants, their data, or biological material

Policy information about studies with [human participants or human data](#). See also policy information about [sex, gender \(identity/presentation\), and sexual orientation](#) and [race, ethnicity and racism](#).

Reporting on sex and gender

Fourth-dose vaccine sera from individuals who had been vaccinated with monovalent vaccine (15 donors; average age: 42 years, range: 30–56 years, 40% male) (Fig. 2A), BA.1 bivalent vaccine sera (20 donors; average age: 55 years, range: 30–80 years, 35% male) (Fig. 2B), and BA.5 bivalent vaccine sera (21 donors; average age: 51 years, range: 18–86 years, 48% male) (Fig. 2C) were collected.

Reporting on race, ethnicity, or other socially relevant groupings

All of the sera obtained from Japanese

Population characteristics

Fourth-dose vaccine sera from individuals who had been vaccinated with monovalent vaccine (15 donors; average age: 42 years, range: 30–56 years, 40% male) (Fig. 2A), BA.1 bivalent vaccine sera (20 donors; average age: 55 years, range: 30–80 years, 35% male) (Fig. 2B), and BA.5 bivalent vaccine sera (21 donors; average age: 51 years, range: 18–86 years, 48% male) (Fig. 2C) were collected.

Recruitment

All protocols involving specimens from human subjects recruited at Interpark Kuramochi Clinic was reviewed and approved by the Institutional Review Board of Interpark Kuramochi Clinic (approval ID: G2021-004). No potential self-selection bias or other biases in the recruitment.

Ethics oversight

All protocols involving specimens from human subjects recruited at Interpark Kuramochi Clinic were reviewed and approved by the Institutional Review Board of Interpark Kuramochi Clinic (approval ID: G2021-004). All human subjects provided written informed consent. All protocols for the use of human specimens were reviewed and approved by the Institutional Review Boards of The Institute of Medical Science, The University of Tokyo (approval IDs: 2021-1-0416 and 2021-18-0617), Kumamoto University (approval ID: 2066), and University of Miyazaki (approval ID: O-1021).

Note that full information on the approval of the study protocol must also be provided in the manuscript.

## Field-specific reporting

Please select the one below that is the best fit for your research. If you are not sure, read the appropriate sections before making your selection.

Life sciences  Behavioural & social sciences  Ecological, evolutionary & environmental sciences

For a reference copy of the document with all sections, see [nature.com/documents/nr-reporting-summary-flat.pdf](https://www.nature.com/documents/nr-reporting-summary-flat.pdf)

## Life sciences study design

All studies must disclose on these points even when the disclosure is negative.

Sample size

The sample sizes ( $n > 3$ ) for cell culture experiments were chosen for applying statistical tests. The sample sizes ( $n > 3$ ) for the hamster studies were chosen because they have previously been shown to be sufficient to evaluate a significant difference among groups (Belsler et al., Nature, 2013; Zhang et al., Science, 2013; Imai et al., Nature Microbiology, 2020; Saito et al., Nature, 2021).

Data exclusions

No data were excluded from the analyses.

Replication

In vitro experiments representative of at least 2 experiments with multiple samples per time point. In vivo experiments (hamster) utilized multiple animals per group per time point and were from more than single experiment, independently. In vivo experiments were replicated and performed independently. All attempts at replication were successful.

Randomization

No method of randomization was used to determine how the animals were allocated to the experimental groups and processed in this study, because covariates (sex and age) were identical (male, 4 weeks old). For experiments other than animal studies, randomization is not applicable because homogenous materials (i.e., cell lines) were used. Therefore, randomization is not applicable.

Blinding

No blinding was carried out, because these are not relevant for an observational study.

## Reporting for specific materials, systems and methods

We require information from authors about some types of materials, experimental systems and methods used in many studies. Here, indicate whether each material, system or method listed is relevant to your study. If you are not sure if a list item applies to your research, read the appropriate section before selecting a response.

### Materials & experimental systems

- |                                     |                                                                 |
|-------------------------------------|-----------------------------------------------------------------|
| n/a                                 | Involved in the study                                           |
| <input type="checkbox"/>            | <input checked="" type="checkbox"/> Antibodies                  |
| <input type="checkbox"/>            | <input checked="" type="checkbox"/> Eukaryotic cell lines       |
| <input checked="" type="checkbox"/> | <input type="checkbox"/> Palaeontology and archaeology          |
| <input type="checkbox"/>            | <input checked="" type="checkbox"/> Animals and other organisms |
| <input checked="" type="checkbox"/> | <input type="checkbox"/> Clinical data                          |
| <input checked="" type="checkbox"/> | <input type="checkbox"/> Dual use research of concern           |
| <input checked="" type="checkbox"/> | <input type="checkbox"/> Plants                                 |

### Methods

- |                                     |                                                    |
|-------------------------------------|----------------------------------------------------|
| n/a                                 | Involved in the study                              |
| <input checked="" type="checkbox"/> | <input type="checkbox"/> ChIP-seq                  |
| <input type="checkbox"/>            | <input checked="" type="checkbox"/> Flow cytometry |
| <input checked="" type="checkbox"/> | <input type="checkbox"/> MRI-based neuroimaging    |

## Antibodies

Antibodies used

For IHC:  
 mouse anti-SARS-CoV-2 N monoclonal antibody (R&D systems, Clone 1035111, Cat# MAB10474-SP, 1:400)  
 For flow cytometry:  
 rabbit anti-SARS-CoV-2 S S1/S2 polyclonal antibody (Thermo Fisher Scientific, Cat# PA5-112048, 1:100)  
 Normal rabbit IgG (Southern Biotech, Cat# 0111-01, 1:100)  
 APC-conjugated goat anti-rabbit IgG polyclonal antibody (Jackson ImmunoResearch, Cat# 111-136-144, 1:50)  
 APC-labeled anti-human HLA class 1 (R&D systems, Cat# FAB7098A)  
 anti-SARS-CoV-2 NP antibodies (BIO Vision, Cat# A2061-50)  
 anti-Rabbit IgG (H+L) cross-adsorbed secondary antibody, Alexa Fluor 488 (Thermo Fisher Scientific, Cat# A-11008).

Validation

Validation was conducted by manufacturers prior to sale, and validation statements are available on the manufacturers' website.

## Eukaryotic cell lines

Policy information about [cell lines and Sex and Gender in Research](#)

Cell line source(s)

HEK293T cells (a human embryonic kidney cell line; ATCC, CRL-3216)  
 HEK293 cells (a human embryonic kidney cell line; ATCC CRL-1573)  
 HEK293S GnTI(-) cells (Reeves PJ et al., PNAS 2002)  
 HOS-ACE2/TMPRSS2 cells (HOS cells stably expressing human ACE2 and TMPRSS2) (Ozono et al., Nat Commun, 2021; Ferreira et al., J Infect Dis, 2021)  
 HEK293-ACE2 cells (HEK293 cells stably expressing human ACE2) (Motozono et al., Cell Host & Microbe, 2021)  
 HEK293-ACE2/TMPRSS2 cells (Motozono et al., Cell Host & Microbe, 2021)  
 Vero cells [an African green monkey (Chlorocebus sabaeus) kidney cell line; JCRB0111]  
 VeroE6/TMPRSS2 cells (JCRB1819) (Matsuyama et al., Proc Natl Acad Sci, 2020)  
 Calu-3 cells (a human lung epithelial cell line; ATCC HTB-55)  
 Calu-3/DSP1-7 cells (Yamamoto et al., Viruses, 2020)

Authentication

None of the cells used were authenticated.

Mycoplasma contamination

All cell lines were regularly tested for mycoplasma contamination by using PCR and were confirmed to be mycoplasma-free.

Commonly misidentified lines (See [ICLAC](#) register)

No commonly misidentified cell lines were used.

## Animals and other research organisms

Policy information about [studies involving animals](#); [ARRIVE guidelines](#) recommended for reporting animal research, and [Sex and Gender in Research](#)

|                         |                                                                                                                                                                                                                                                                                                                                                  |
|-------------------------|--------------------------------------------------------------------------------------------------------------------------------------------------------------------------------------------------------------------------------------------------------------------------------------------------------------------------------------------------|
| Laboratory animals      | Syrian hamsters (male, 4 weeks old) were purchased from Japan SLC Inc. (Shizuoka, Japan).                                                                                                                                                                                                                                                        |
| Wild animals            | No wild animals used in this study.                                                                                                                                                                                                                                                                                                              |
| Reporting on sex        | Epidemiological studies of the COVID-19 patients have suggested the male bias in outcomes of lung illness. In addition, hamster model, male hamsters have been reported to be more susceptible to SARS-CoV-2 infection (Lunzhi Yuan et al Signal Transduction and Targeted study, 2021). Therefore, also in this study, male hamsters were used. |
| Field-collected samples | No field collected sample was used in the study.                                                                                                                                                                                                                                                                                                 |
| Ethics oversight        | All experiments with hamsters were performed in accordance with the Science Council of Japan's Guidelines for Proper Conduct of Animal Experiments. The protocols were approved by the Institutional Animal Care and Use Committee of National University Corporation Hokkaido University (approval numbers 20-0123 and 20-0060).                |

Note that full information on the approval of the study protocol must also be provided in the manuscript.

## Flow Cytometry

### Plots

Confirm that:

- The axis labels state the marker and fluorochrome used (e.g. CD4-FITC).
- The axis scales are clearly visible. Include numbers along axes only for bottom left plot of group (a 'group' is an analysis of identical markers).
- All plots are contour plots with outliers or pseudocolor plots.
- A numerical value for number of cells or percentage (with statistics) is provided.

### Methodology

|                           |                                                                                                                                                                                                                                                                                                                                                                                                                                                                   |
|---------------------------|-------------------------------------------------------------------------------------------------------------------------------------------------------------------------------------------------------------------------------------------------------------------------------------------------------------------------------------------------------------------------------------------------------------------------------------------------------------------|
| Sample preparation        | Clinical isolates of XBB.1, XBB.1.5, and Delta were inoculated into human iPSC-derived lung organoids. Single-cell suspensions of the infected human iPSC-derived lung organoids were treated with 1 × Permeabilization Buffer (e-Bioscience, Thermo Fisher Scientific, Cat# 00-8333-56) for FACS analysis. For fusion assay, HEK293 cells were cotransfected with S expression plasmids (400 ng) and pDSP8-11 (400 ng) using TransIT-LT1 (Takara, Cat# MIR2300). |
| Instrument                | MACSQuant Analyzer 10 (Miltenyi Biotec), FACS Canto II (BD Biosciences)                                                                                                                                                                                                                                                                                                                                                                                           |
| Software                  | FlowJo software v10.7.1 (BD Biosciences), FlowJo software v10.9 (BD Biosciences)                                                                                                                                                                                                                                                                                                                                                                                  |
| Cell population abundance | 10,000 or 50,000 cells gated in the FSC-A/SSC-A plot were acquired for each condition.                                                                                                                                                                                                                                                                                                                                                                            |
| Gating strategy           | 10,000 or 50,000 cells gated in the FSC-A/SSC-A plot were acquired for each condition. For measurement of the expression level of the N protein and human HLA class 1, isotype control was used as a negative control to exclude FITC- or APC-negative population. For measurement of the surface expression level of the S protein, isotype control (normal rabbit IgG) was used as a negative control to exclude APC-negative population.                       |

- Tick this box to confirm that a figure exemplifying the gating strategy is provided in the Supplementary Information.
